# Supplementary material
Source: Springer Nature journal article supplement (https://www.springermedizin.de/resource/supplementary/13054_2011_9636_MOESM2_ESM.pdf/9706794)

○ ○ ○ Diabetic ● ● ● Non-diabetic

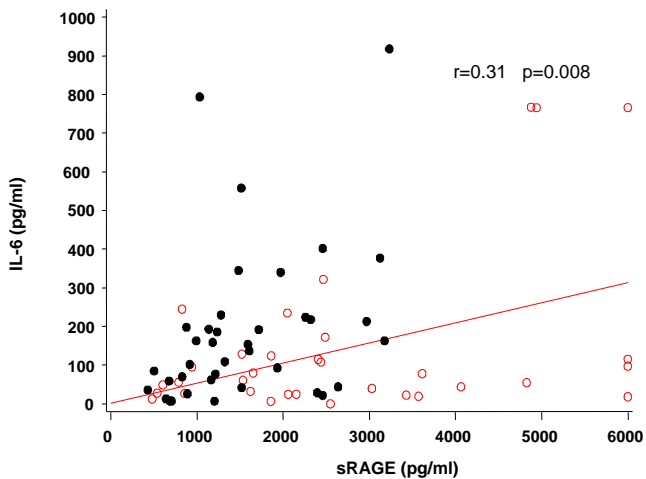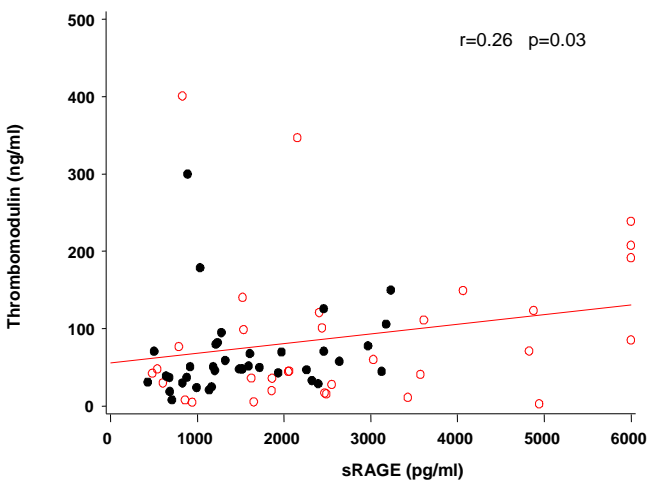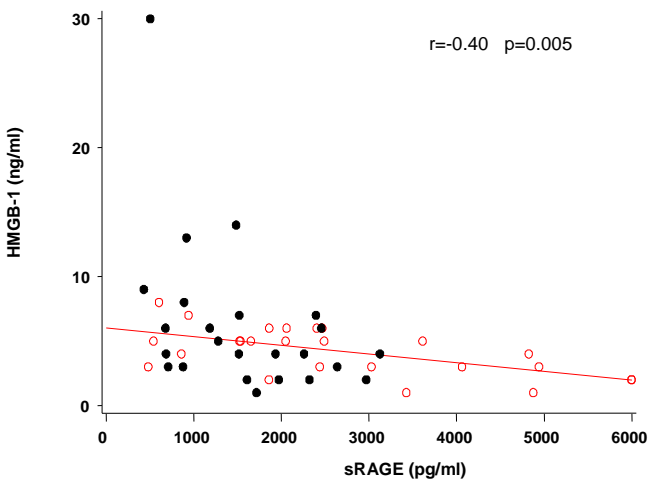

Supplement: MOESM2 [file 9706794]
